# 1 **Parkinson Disease**

## 2 **ERP sources in middle cingulate and precuneus differentiate Parkinson's patients from** 3 **healthy controls and lingual gyri sources reflect human recombinant EPO effects in a** 4 **Flanker task**

5 Maria L Bringas Vega<sup>1,2</sup>, Shengnan Liu<sup>1</sup>, Min Zhang<sup>1</sup>, Ivonne Pedroso Ibañez<sup>2</sup>, Lilia M.  
6 Morales Chacon<sup>2</sup>, Lidice Galan Garcia<sup>3</sup> Vanessa Perez Bocourt<sup>4</sup>, Marjan Jahanshahi<sup>1,5</sup>, Pedro  
7 A Valdes-Sosa<sup>1,3</sup>

- 8 1. The Clinical Hospital of Chengdu Brain Science Institute, MOE Key Lab for Neuroinformatics,  
9 University of Electronic Science and Technology of China, Chengdu, China;  
10 2. Centro Internacional de Restauracion Neurológica CIREN, La Habana, Cuba;  
11 3. Centro de Neurociencias de Cuba CNEURO La Habana Cuba  
12 4. Miami Dade College, Florida USA  
13 5. UCL Queen Square Institute of Neurology, London UK;

14 These authors contributed equally to the paper.

15 Correspondence should be addressed to Maria L. Bringas Vega  
16 [maria.bringas@neuroinformatics-collaboratory.org](mailto:maria.bringas@neuroinformatics-collaboratory.org)

## 17 **Abstract**

18 We used EEG source analysis to identify which cortical areas were involved in the suppression  
19 of competing responses on a flanker task and compare the potential efficacy of recombinant-  
20 human erythropoietin (rHuEPO) in the performance of Parkinson's Disease patients.

21 The samples were 18 medicated PD patients (9 with rHuEPO and 9 without rHuEPO) and 9  
22 age and education-matched healthy controls (HCs) who completed the flanker task with  
23 simultaneous EEG recordings. N1, N2 and P3 event-related potential (ERP) components were  
24 identified and a low-resolution tomography (LORETA) inverse solution was employed to  
25 localize the neural generators.

26 Reaction times and errors were increased for the incongruent flankers for PD patients compared  
27 to controls. EEG source analysis identified an effect of rHuEPO on the lingual gyri for the early  
28 N1 component. N2-related sources in middle cingulate and precuneus were associated with the  
29 inhibition of automatic responses evoked by incongruent stimuli differentiating PD and HCs.

30 From our results the rHuEPO seems to mediate an effect on N1 sources in lingual gyri but not  
31 on behavioural performance. N2-related sources in middle cingulate and precuneus  
32 differentiated PD and HCs.

## 33 **Introduction**

34 The basal ganglia structures particularly the striatum and the subthalamic nucleus are part of  
35 the fronto-striatal-subthalamic-pallidal network considered to mediate habitual/automatic and  
36 goal-directed inhibition as well as habitual and goal-directed action [1,2]. Thus, these circuits  
37 are hypothesized to coordinate the selection and suppression of competing responses.  
38 Parkinson's disease (PD), the prototypical basal ganglia disorder, is associated with deficits in  
39 inhibitory control on a number of experimental tasks such as the stop signal [3], go no-go  
40 reaction times [4], the Stroop and the Hayling Sentence Completion task [3], and the Simon  
41 task [5,6]. PD patients also have difficulty in suppressing interference arising from the

42 automatic activation of prepotent responses evoked by incongruent flankers in the Ericksen's  
43 Flanker Task [7]. Relative to controls, PD patients show increased reaction times (RTs) and  
44 errors on incongruent trials compared to congruent trials (eg. [8,9,10,11]).

45 In PD there is an ongoing search for neuroprotective agents which may slow down the  
46 progression of the illness and improve cognitive deficits [12]. The recombinant-human  
47 erythropoietin (rHuEPO) is studied with great interest due to its neuroprotector properties in  
48 neurologic diseases [13]. The anti-apoptotic, anti-inflammatory and cytoprotective effects of  
49 EPO in parkinsonism animal models have been described elsewhere [14,15]. The aim of our  
50 study is to use a flanker task to identify if rHuEPO produces beneficial effects on performance  
51 of PD patients and locate the neural generators involved in the selection and suppression of  
52 competing responses in comparison with healthy controls (HCs).

## 53 **Materials and Methods**

54 **Methods:** 18 PD patients (Hoehn and Yahr stages I to III, mean age 53.9, SD 3.2 years) were  
55 recruited at the Clinic of Movement Disorders and Neurodegeneration, Centro Internacional de  
56 Restauracion Neurológica (CIREN) in La Habana, Cuba to participate in a safety clinical assay  
57 of Erythropoietin (rHuEPO) in PD. The design of this investigation, results, scheme of  
58 application and doses employed may be found in [16]. Inclusion criteria were: a clinical  
59 diagnosis of idiopathic PD according to the UK Brain Bank criteria and a good response to  
60 dopaminergic treatment and aged between 45-75 years [17]. Exclusion criteria were:  
61 manifestation or indicative signs of major cognitive impairment, psychotic symptoms, and/or  
62 presence of other chronic diseases. Nine of the PD patients through random allocation received  
63 additionally to their usual anti-parkinson medication, rHuEPO for five weeks and the other  
64 nine did not. rHuEPO approved and registered for its use in humans was obtained at the Centro  
65 de Inmunología Molecular, La Habana Cuba (ior® EPOCIM). There were no significant  
66 differences in age, years of education or duration of illness between the two PD groups. To  
67 exclude dementia and major depression, the Mini Mental State Examination and the Hamilton  
68 Depression Scale were respectively administered [18,19]. All patients were assessed on the  
69 motor subscale of the Unified Parkinson's Disease Rating Scale (UPDRS) both during "on"  
70 (mean 6.3, SD1.1) and "off" medication (mean 21.7, SD 4.3) states. Nine HCs matched in age  
71 (mean 51.2, SD 3.9 years) and educational level were recruited at the same clinic. The PD  
72 patients were tested on their usual anti-parkinsonism medication. The patients signed an  
73 informed consent to participate in this study as a complement of the clinical trial following the  
74 CIREN ethic's committee regulations.

### 75 **Eriksen's Flanker Task**

76 All participants completed the Eriksen's Flanker task, while the EEG was simultaneously  
77 recorded. Each trial of the task consisted of the presentation of a set of 5 ordered letters  
78 (HHHHH or SSSSS) for the congruent condition and 5 letters with H or S at the center and  
79 different laterals or flankers (SSHSS or HSHHH) for the incongruent condition. Participants  
80 were instructed to respond to the central letter, whether H or S, by pressing a key with the index  
81 finger of the right or left hand respectively. Participants were instructed to respond as fast and  
82 as accurately as possible. A total of 480 trials in two blocks, each lasting 8 minutes were  
83 completed. In each block 80 stimuli were shown for the congruent condition and 160 for the  
84 incongruent, with the objective of provoking a greater number of errors. Reaction times (RTs)  
85 were measured to the nearest milliseconds and errors were recorded.

86 The physical characteristics of the stimuli were black letters on a white frame with an  $h = 1.5$   
87 cms and  $L = 7$  cms, under  $6^\circ$  a visual angle. The distance of the participant to the computer  
88 monitor was 60 cms. Each stimulus was presented at the center of the screen and kept for 190

90 msec., followed by an interstimulus interval of 1735 msec. A training block of 40 stimuli was  
91 designed to ensure task instructions were understood.

92

### 93 **EEG:**

94 The Electroencephalogram (EEG) was continuously recorded at a sampling rate of 512 Hz  
95 from 64 electrodes located at standard positions of the International 10/20 System using a Brain  
96 Vision system (Brain Products [https://www.brainproducts.com/products\\_by\\_apps.php?aid=5](https://www.brainproducts.com/products_by_apps.php?aid=5)  
97 [20]). The electro-oculogram (EOG, horizontal and vertical) was recorded from electrodes  
98 placed 1 cm to the left and right of the external canthi, and from an electrode beneath the right  
99 eye. The ears were used as on-line reference and the front as earth.

100 Data were filtered using 1-30 Hz and a notch filter to eliminate the 60Hz powerline artefact.  
101 All data were referenced using an average reference to all the channels. The baseline was  
102 corrected between -400 to -200 msec. Epochs with electric activity exceeding baseline activity  
103 by 100  $\mu$ V were considered as artefacts and were automatically rejected from further  
104 processing (15% of epochs related to hits and 11% of the epochs related to errors). For the  
105 analysis, several electrodes were excluded (EOG, ECG, TP9 and TP10).

106

### 107 **ERP Components:**

108 EEG recordings were analyzed for each participant within the two experimental conditions and  
109 averaged over the group using Analyzer software  
110 (<https://www.brainproducts.com/productdetails.php?id=17>). Epochs of 900 msec. (from -200  
111 msec. (baseline) until 700 msec. post-stimulus onset) were analyzed time-locked to the  
112 stimulus. We selected three windows to examine the stimulus-locked ERPs, using only the  
113 correct response averages for the N1, N2 and P3 components in the expected time-windows  
114 (see ERPs guidelines in [21]).

115 In order to localize the generators of the ERP components, a lead field was constructed for each  
116 participant to calculate the inverse solution at the three selected latencies using LORETA (Low  
117 Resolution Tomography) (<http://www.uzh.ch/keyinst/loreta>)[22]. The significant specific  
118 source effects in each latency were independently confirmed by means of permutation methods  
119 [23]. The tomographic inverse solution was plotted using an average brain, (volume constraints)  
120 with the coordinates of the AAL (Automated Anatomical Labelling of Activations) 116  
121 structures atlas of the Montreal Neurological Institute (MNI) [24].

122 **Statistical analysis.** The General Linear Model and *a priori* contrasts were used for statistical  
123 analysis, with Group (PD with rHuEPO vs PD without rHuEPO) as the between group factor  
124 and the experimental condition (incongruent versus congruent) as the within-subject repeated  
125 measures factor. The three windows for analysis were: 100-180, 180-300 and 300-450 msec.  
126 This was also applied for the neural sources using voxel-based analysis for the individual  
127 source matrices. For the second objective, we analyzed the difference between the two groups  
128 of PD vs Healthy controls in the same way. The resulting F statistic was corrected twice. First,  
129 using Bonferroni corrected according to the total number of points in the analysis window (700  
130 milliseconds) and divided by  $\alpha=0.05$ . The second correction was using FDR (false positives  
131 (FDR: false discovered rate) for a q-value=0.01, that is, controlling a 1% of the expected value  
132 [25]. Analysis was completed with STATISTICA 7.0 and the software (NEEST) from  
133 Neuronic <http://www.neuronicsa.com/>

## 134 **Results and Discussion**

### 135 **Behaviour:**

136 All groups, PD with or without rHuEPO and HCs had longer RTs and made more errors on the  
 137 incongruent than the congruent trials (Table 1 and 2). However, when comparing PD patients  
 138 with or without rHuEPO, there were no significant differences in performance between the task  
 139 conditions (Table 1).

| Table 1                     | PD with rHuEPO n=9 |                | PD without rHuEPO n=9 |                |
|-----------------------------|--------------------|----------------|-----------------------|----------------|
|                             | congruent          | incongruent    | congruent             | incongruent    |
|                             | Means (SD)         | Means (SD)     | Means (SD)            | Means (SD)     |
| <b>Reaction times msec.</b> | 459.33 (71.76)     | 479.89 (49.43) | 460.22 (72.10)        | 488.22 (63.76) |
| <b>Percent errors</b>       | 13.22 (7.76)       | 43.22 (21.37)  | 8.78 (6.76)           | 32.00 (15.79)  |

140 **Table 1 : The results of the reaction times and the percent of errors for the congruent and incongruent**  
 141 **trials for the PD patients with and without rHuEPO. The values in the table are means with standard**  
 142 **deviations in parenthesis.**

143  
 144 When comparing all PD patients and HCs (Table 2), the results were consistent with previous  
 145 findings and RTs increased with incongruent flankers compared to congruent for both groups.  
 146 This RT cost of incongruence was significantly greater among PD patients ( $p=0.026$ ) than  
 147 healthy controls ( $p=0.91$ ). The percent of errors in the PD group was significantly higher  
 148 ( $p=0.0003$ ) for both (congruent:  $p=0.006$ ) and (incongruent:  $p=0.0001$ ) trials than HCs,  
 149 indicating reduced efficiency in the suppression of competing responses (Table 2).

|                            | PD n=18        |                | HC n=9         |                |
|----------------------------|----------------|----------------|----------------|----------------|
|                            | congruent      | incongruent    | congruent      | incongruent    |
|                            | Means (SD)     | Means (SD)     | Means (SD)     | Means (SD)     |
| <b>Reaction time msec.</b> | 459.78 (69.79) | 484.06 (55.51) | 411.22 (52.00) | 431.33 (43.47) |
| <b>Percent errors</b>      | 9.00 (3.81)    | 37.61 (19.12)  | 3.33 (2.40)    | 11.00 (7.42)   |

150 **Table 2: The results of the reaction times and percent of errors for the congruent and incongruent trials**  
 151 **for the Parkinson's. disease (PD) patients and healthy control (HCs) groups. The values in the table are**  
 152 **means with standard deviations in parenthesis.**

153  
 154 **Electrophysiology:**

155 **N1.** The only significant difference for the N1 component was found between the two groups  
 156 of patients ( $p<0.01$ ), but not between conditions. Higher mean negative amplitudes for rHuEPO  
 157 group ( $-4.72 \mu\text{V}$ ) relative to the non rHuEPO patients ( $-1.2 \mu\text{V}$ ) was located in occipito-parietal  
 158 electrodes ( $p<0.01$ ).

159 **N2.** The N2 component only statistically differentiated between HC and all patients ( $p<0.001$ )  
 160 with higher mean negative amplitude for controls ( $-2.45 \mu\text{V}$ ) than PD patients ( $-0.72 \mu\text{V}$ ) in  
 161 the Cz location.

162 **P3.** The P3 component did not show any statistical differences for group or condition ( $p>.05$ ).

163 **Source analysis of the ERP differences between PD patients with and without rHuEPO:**

164 The comparison between patients showed that PD group with rHuEPO showed a larger N1  
 165 component at the lingual gyri than the other patient group ( $p< 0.05$ ). The N2 did not show any  
 166 significant differences. See figure 1.

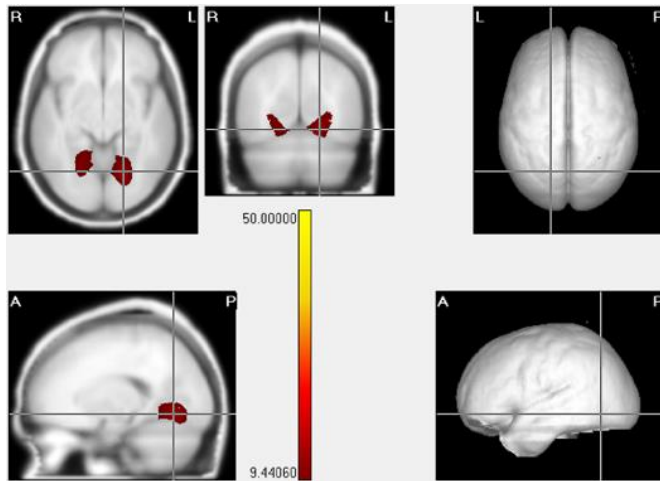

167

168 **Figure 1: The Lingual Gyri are the sources of the N1 component according to AAL coordinates (X=92,**  
169 **Y=76, Z=172). The scale of statistical significance is self generated using the real values of the original data.**  
170 **All the voxels plotted were significant at  $p < 0.05$ ).**  
171

172 **Source analysis of the ERP differences between all PD patients and HCs:**

173 HCs showed a higher activation in N2 component at the sources at the middle cingulum and  
174 precuneus bilaterally compared with PD patients. See Figure 2.

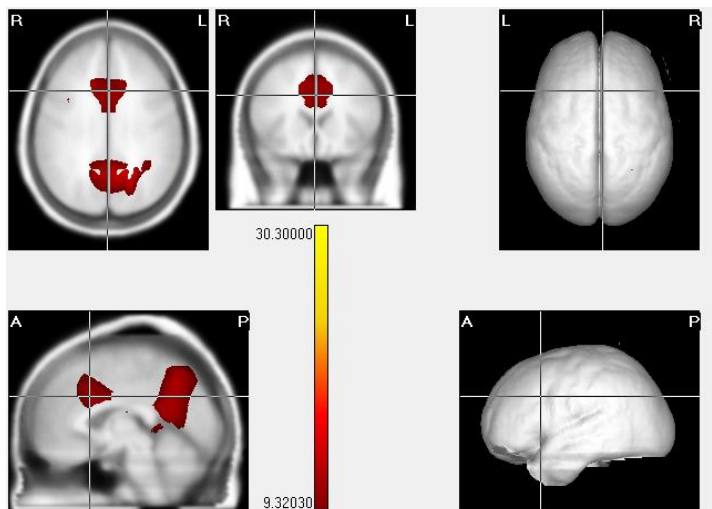

175

176 **Figure 2: The N2 component showed maximal activation at middle cingulum and precuneus bilaterally (left**  
177 **located at X=92, Y=108, Z=156). To the right the localization of the precuneus left. The bicolor scale is**  
178 **showing all the significant values after Bonferroni correction and using permutations.**  
179

180 **Discussion**

181 **Behavioural results**

182 PD patients showed significantly increased reaction times and a higher number of errors to  
183 the incongruent stimuli during the performance of the flanker task in comparison to age and  
184 education matched HCs. These higher error rates in PD than controls are consistent with the  
185 proposal that the basal ganglia together with the anterior cingulate [26] participate in the  
186 monitoring of incongruence and error monitoring [27,28] which may be impaired in PD due  
187 to the dopamine deficiency (for a recent revision how the progressive dopamine deficiency  
188 reduces striatal cholinergic interneuron activity see [29]). But we did not find the expected  
189 beneficial effect of rHuEPO on the behavioural performance (RT and accuracy) in PD  
190 patients who received the drug in comparison with the others. Nonetheless, the differences

191 between groups of patients were found in the electrophysiological results. For example in the  
192 N1 component.

193 This component reflects selective attention, linked to the basic characteristics of a stimulus,  
194 and also to the recognition of a specific visual pattern [30]. In terms of spatial localization, the  
195 N1 amplitude is greater in occipital regions as well as in discrimination tasks [30,31]. On the  
196 other hand, Bokura et al (2001) using LORETA identified additional sources of the visual N1  
197 in the inferior temporal lobe [32]. We localized the generators of N1, also using LORETA, in  
198 the lingual gyrus of the occipital lobe of both hemispheres, with the PD patients who received  
199 rHuEPO having larger amplitudes than the PD group who did not. This is suggestive of a  
200 probable neuroprotective effect of rHuEPO on the lingual gyrus, a region associated with the  
201 early processing of visual stimuli.

202  
203 The second component N2 has been found in several studies of incongruence using the Flanker  
204 task and its latency was unaltered in medicated PD patients (for a review see [33]). In our study,  
205 we did not find any differences between experimental conditions or in the N2 latency, but the  
206 HCs had significantly higher N2 amplitudes than PD patients. The neural generators of this  
207 difference was localised to the posteromedial portion of the parietal lobe, the precuneus, a  
208 structure involved in the processing of perceptual ambiguities of stimuli [34]. In PD, relative  
209 to HCs Van Eimeren found dysfunction of the default mode network and particularly  
210 deactivation of the posterior cingulate cortex and the precuneus[35]. These changes in PD may  
211 be closely related to higher errors in executive tasks in PD compared with healthy controls.  
212 The other region showing significant N2 differences between PD and HCs was the middle  
213 cingulate cortex, probably related to monitoring of conflict in the Flanker task [36].

214  
215 Contrary to our expectation, rHuEPO was not associated with a significant improvement in  
216 behavioural performance and did not influence the neural generators of the N2. Since this  
217 study was completed as part of a safety trial, the doses employed were small, nevertheless,  
218 the early N1 at the lingual gyrus could be reflect the differential effects of rHuEPO. This  
219 incremental amplitude, reflecting more allocation of neural resources, could possibly be  
220 related to the neuroprotector effect of rHuEPO on central cholinergic neurons, which have  
221 been demonstrated in vitro and in vivo studies [13].

222  
223 Limitations of this study are the small sample size and the inverse solution restricted to cortical  
224 structures. Thus, the results require confirmation with larger samples in future studies.  
225 However, the results highlighted the role of EEG source analysis and advantages of  
226 electrophysiology with its high temporal resolution and insensitivity to placebo effects, in  
227 identifying brain changes after an intervention such as rHuEPO.

## 228 **Conclusions**

229 -Electrophysiology could be a tool able for identifying potential effects of neuroprotective  
230 compounds.

231 -rHuEPO did not improve behavioural performance but had an effect on the N1 component at  
232 the lingual gyrus.

233 - Relative to HCs, PD patients had slower RTs and more errors on the incongruent trials, and  
234 N2 sources in the middle cingulate and precuneus bilaterally differentiated patients and  
235 controls.

## 236 **Data Availability**

237 The tables with the behavioural performance of the samples was submitted in the  
238 supplementary material 1, described below. The raw EEG recordings in BrainVision format  
239 and the latencies for the N1, N2 and P3 components are in text files, stored in a local server  
240 in Cuba, but can be available under request to the corresponding author.  
241 [maria.bringas@neuroinformatics-collaboratory.org](mailto:maria.bringas@neuroinformatics-collaboratory.org)

## 242 **Conflicts of Interest**

243 The authors declare that there is no conflict of interest regarding the publication of this paper.

## 244 **Funding Statement**

245 This paper received support from the NSFC (China-Cuba-Canada) project (No. 81861128001) and the  
246 funds from National Nature and Science Foundation of China (NSFC) with funding No. 61871105,  
247 61673090, and 81330032, and CNS Program of UESTC (No. Y0301902610100201).

## 248 **Acknowledgments**

249 The authors would like to thank to the Centro de Neurociencias de Cuba, specially to Valia Rodriguez  
250 and Indira Alvarez for the support during the recordings of the ERPs and the Centro Internacional de  
251 Restauracion Neurologica for the recruitment and neuropsychological evaluation of the patients. We  
252 are in debt with all the PD patients and their caretakers who volunteer to participate in our study.

## 253 **Supplementary Materials**

254 The supplementary material 1 consisted in one excel table with the behavioural performance  
255 of the subjects during the Flanker task. Tab "Answers": the hits, errors and non-answers in  
256 the congruent and incongruent condition. Tab "Reaction Time": the mean and standard  
257 deviation (SD) of the hits, errors of each subject in each group for congruent and incongruent  
258 trials.

## 259 **References**

- 260 [1] Jahanshahi M, Obeso I, Rothwell JC et al., A fronto-striato-subthalamic-pallidal  
261 network for goal-directed and habitual inhibition. *Nat Rev Neurosci*. 2015 Nov 4. doi:  
262 10.1038/nrn4038
- 263 [2] Balleine, Bernard W., Mauricio R. Delgado et al., "The role of the dorsal striatum in  
264 reward and decision-making." *Journal of Neuroscience* 27.31 (2007): 8161-8165.
- 265 [3] Obeso I, Wilkinson L, Casabona E et al., Deficits in inhibitory control and conflict  
266 resolution on cognitive and motor tasks in Parkinson's disease. *Exp Brain Res*. 2011  
267 Jul;212(3): 371-384.
- 268 [4] Cooper, J. A., Sagar et al., Slowed central processing in simple and go/no-go reaction  
269 time tasks in Parkinson's disease. *Brain*, 117(3), 517-529, 1994.
- 270 [5] Praamstra, P., and F. M. Plat. "Failed suppression of direct visuomotor activation in  
271 Parkinson's disease." *Journal of Cognitive Neuroscience* 13.1 (2001): 31-43.
- 272 [6] Van Wouwe, N. C., van den Wildenberg et al., Speed pressure in conflict situations  
273 impedes inhibitory action control in Parkinson's disease. *Biological psychology*, 101, 44-  
274 60, 2014.

- 275 [7] Eriksen B. A., Eriksen C. W., Effects of noise letters upon the identification of a  
276 target letter in a nonsearch task. 16 143–149, 1974. DOI: 10.3758/BF03203267
- 277 [8] Praamstra, P., Plat, et al., Motor cortex activation in Parkinson's disease: Dissociation  
278 of electrocortical and peripheral measures of response generation. *Movement disorders:*  
279 *official journal of the Movement Disorder Society*, 14(5), 790-799, 1999.
- 280 [9] Praamstra, P., Stegeman, et al., Reliance on external cues for movement initiation in  
281 Parkinson's disease. Evidence from movement-related potentials. *Brain: a journal of*  
282 *neurology*, 121(1), 167-177, 1998.
- 283 [10] Wylie, S. A., Stout, et al., Activation of conflicting responses in Parkinson's disease:  
284 evidence for degrading and facilitating effects on response  
285 time. *Neuropsychologia*, 43(7), 1033-1043, 2005.
- 286 [11] Wylie, S. A., van den Wildenberg, et al., The effect of Parkinson's disease on  
287 interference control during action selection. *Neuropsychologia*, 47(1), 145-157, 2009.
- 288 [12] Athauda, D., & Foltynie, T., The ongoing pursuit of neuroprotective therapies in  
289 Parkinson disease. *Nature reviews neurology*, 11(1), 25, 2015.
- 290 [13] Brines, M., & Cerami, A., Emerging biological roles for erythropoietin in the  
291 nervous system. *Nature Reviews Neuroscience*, 6(6), 484–494, 2005.  
292 <https://doi.org/10.1038/nrn1687>
- 293 [14] Sirén, A.-L., Faßhauer, et al., Therapeutic potential of erythropoietin and its  
294 structural or functional variants in the nervous system. *Neurotherapeutics*, 6(1), 108–127,  
295 2009. <https://doi.org/10.1016/j.nurt.2008.10.041>
- 296 [15] Xue, Y.-Q., Zhao, et al., Intrastriatal administration of erythropoietin protects  
297 dopaminergic neurons and improves neurobehavioral outcome in a rat model of  
298 Parkinson's disease. *Neuroscience* 146, 1245–58, 2007.
- 299 [16] Pedroso, I., Bringas, M. L., Aguiar, A., et al., Use of Cuban Recombinant Human  
300 Erythropoietin in Parkinson's Disease Treatment. *MEDICC Review*, 14(1), 11–17,  
301 2012.
- 302 [17] Hughes, A. J., Daniel, et al., Accuracy of clinical diagnosis of idiopathic Parkinson's  
303 disease: a clinico-pathological study of 100 cases. *Journal of Neurology, Neurosurgery &*  
304 *Psychiatry*, 55(3), 181-184, 1992.
- 305 [18] Folstein MF, Robins LN, Helzer JE, The Mini-Mental State Examination. *Arch Gen*  
306 *Psychiatry*. 1983;40(7):812. doi:10.1001/archpsyc.1983.01790060110016
- 307 [19] Hamilton, M. A., A Rating Scale for Depression. *J Neurol Neurosurg Psychiatry*, 23,  
308 56–62, 1960.
- 309 [20] Jasper H. H., “Report of the Committee on Methods of Clinical Examination in  
310 Electroencephalography,” *Electroencephalography and Clinical Neurophysiology*, Vol.  
311 10, 1958, pp. 370-371. Hdoi:10.1016/0013-4694(58)90053-1
- 312 [21] Picton et al., Guidelines for using human event-related potentials to study cognition:  
313 Recording standards and publication criteria. *Psychophysiology*, 37 ~2000, 127–152,  
314 2000.
- 315 [22] Pascual-Marqui, R. D., Lehmann, et al., Low resolution brain electromagnetic  
316 tomography (LORETA) functional imaging in acute, neuroleptic-naive, first-episode,  
317 productive schizophrenia. *Psychiatry Research: Neuroimaging*, 90(3), 169-179, 1999.  
318 [http://dx.doi.org/10.1016/S0925-4927\(99\)00013-X](http://dx.doi.org/10.1016/S0925-4927(99)00013-X)



- 319 [23] Nichols, T. E. and Holmes, A. P., Nonparametric permutation tests for functional  
320 neuroimaging: A primer with examples. *Hum. Brain Mapp.*, 15: 1-25, 2002.  
321 doi:10.1002/hbm.1058
- 322 [24] Tzourio-Mazoyer, N., Landeau, et al., Automated anatomical labeling of activations  
323 in SPM using a macroscopic anatomical parcellation of the MNI MRI single-subject  
324 brain. *Neuroimage*, 15(1), 273-289, 2002.
- 325 [25] Chumbley, J. R., & Friston, K. J., False discovery rate revisited: FDR and  
326 topological inference using Gaussian random fields. *Neuroimage*, 44(1), 62-70, 2009.
- 327 [26] Botvinick, M. M., Cohen, et al., Conflict monitoring and anterior cingulate cortex:  
328 an update. *Trends in cognitive sciences*, 8(12), 539-546, 2004.
- 329 [27] Brázdil, M., Roman, R., Falkenstein, M. et al. *Exp Brain Res* (2002) 146: 460.  
330 <https://doi.org/10.1007/s00221-002-1201-y>
- 331 [28] Falkenstein, M., Hoormann, et al., ERP components on reaction errors and their  
332 functional significance: a tutorial. *Biological psychology*, 51(2-3), 87-107, 2000.
- 333 [29] McKinley, J. W., Shi, Z., et al., Dopamine Deficiency Reduces Striatal Cholinergic  
334 Interneuron Function in Models of Parkinson's Disease. *Neuron*, 103(6), 1056-1072.e6,  
335 2019. <https://doi.org/10.1016/j.neuron.2019.06.013>
- 336 [30] Luck, S. J., Woodman, et al., Event-related potential studies of attention. *Trends in*  
337 *cognitive sciences*, 4(11), 432-440, 2000.
- 338 [31] Mangun, G. R., & Hillyard, et al., Allocation of visual attention to spatial locations:  
339 tradeoff functions for event-related brain potentials and detection  
340 performance. *Perception & Psychophysics*, 47(6), 532-550, 1990.
- 341 [32] Bokura, H., Yamaguchi, S., Kobayashi, et al., Electrophysiological correlates for  
342 response inhibition in a Go/NoGo task. *Clinical Neurophysiology* 112, 2224–2232, 2001.
- 343 [33] Seer, C., Lange, F., Georgiev, et al., Event-related potentials and cognition in  
344 Parkinson's disease: An integrative review. *Neuroscience & Biobehavioral Reviews*, 71,  
345 691-714, 2016.
- 346 [34] Cavanna, A. E., & Trimble, et al., The precuneus: A review of its functional anatomy  
347 and behavioural correlates. *Brain*, 129(3), 564–583, 2006.  
348 <https://doi.org/10.1093/brain/awl004>
- 349 [35] van Eimeren, Thilo, et al. "Dysfunction of the default mode network in Parkinson  
350 disease: a functional magnetic resonance imaging study." *Archives of neurology* 66.7:  
351 877-883, 2009.
- 352 [36] Enriquez-Geppert, S., Eichele, et al., Functional parcellation of the inferior frontal  
353 and midcingulate cortices in a flanker-stop-change paradigm. *Human brain*  
354 *mapping*, 34(7), 1501-1514, 2013.
